# Supplementary material for: Using an UPLC/MS-based untargeted metabolomics approach for assessing the antioxidant capacity and anti-aging potential of selected herbs
Source: Royal Society of Chemistry journal article supplement (doi:10.1039/d0ra06047j), 2020-01-01
Supplement: d0ra06047j1.pdf [file d0ra06047j1.pdf]

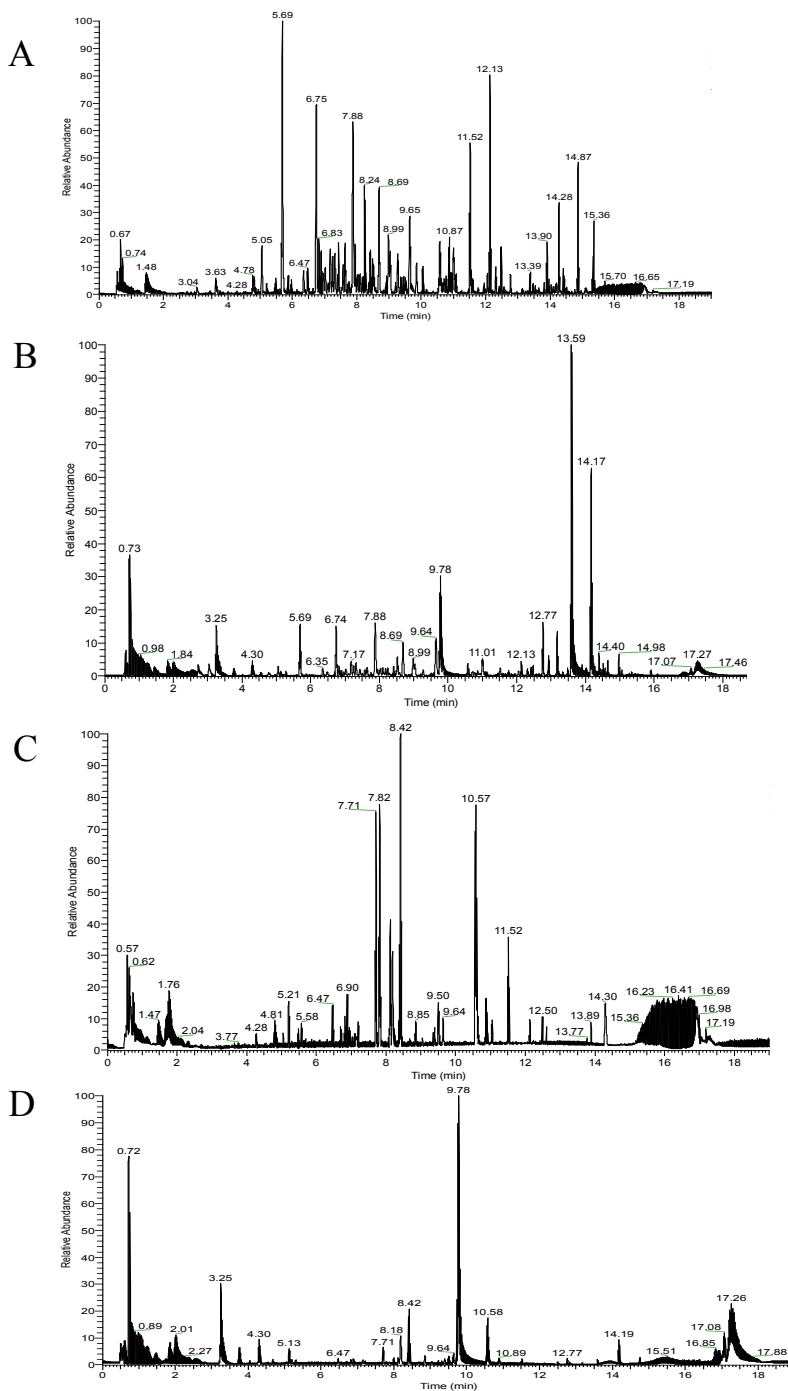

Figure S1. Base peak chromatogram of the ethanol extract of Chamomile, A: negative mode; B, positive mode and aqueous extract of chamomile, C, negative mode; D, positive mode.

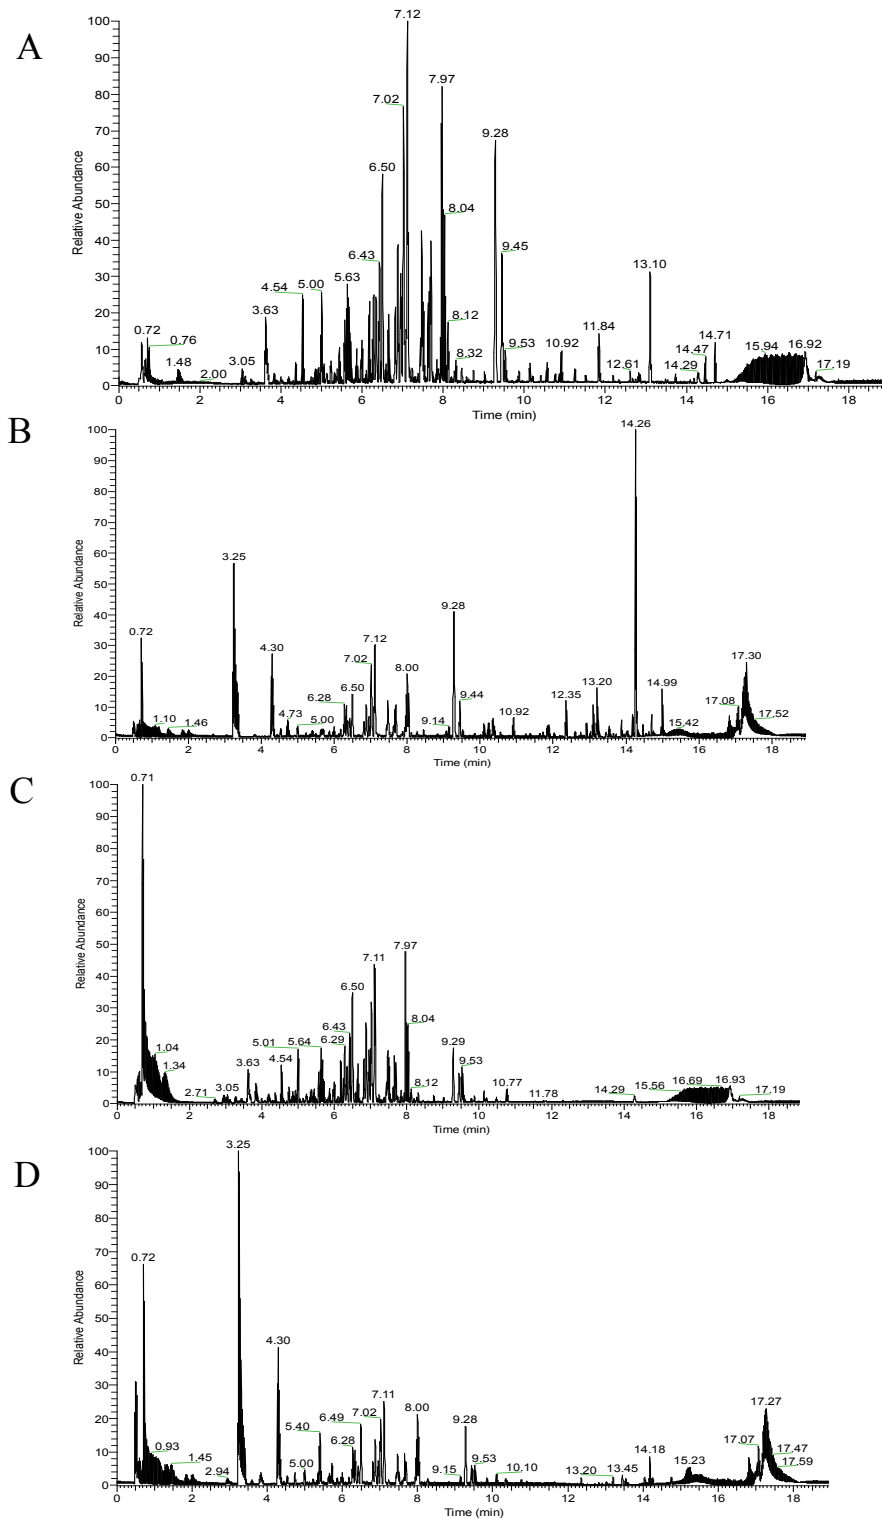

Figure S2. Base peak chromatogram of the ethanol extract of Pelargonium, A: negative mode; B, positive mode and aqueous extract of pelargonium, C, negative mode; D, positive mode.

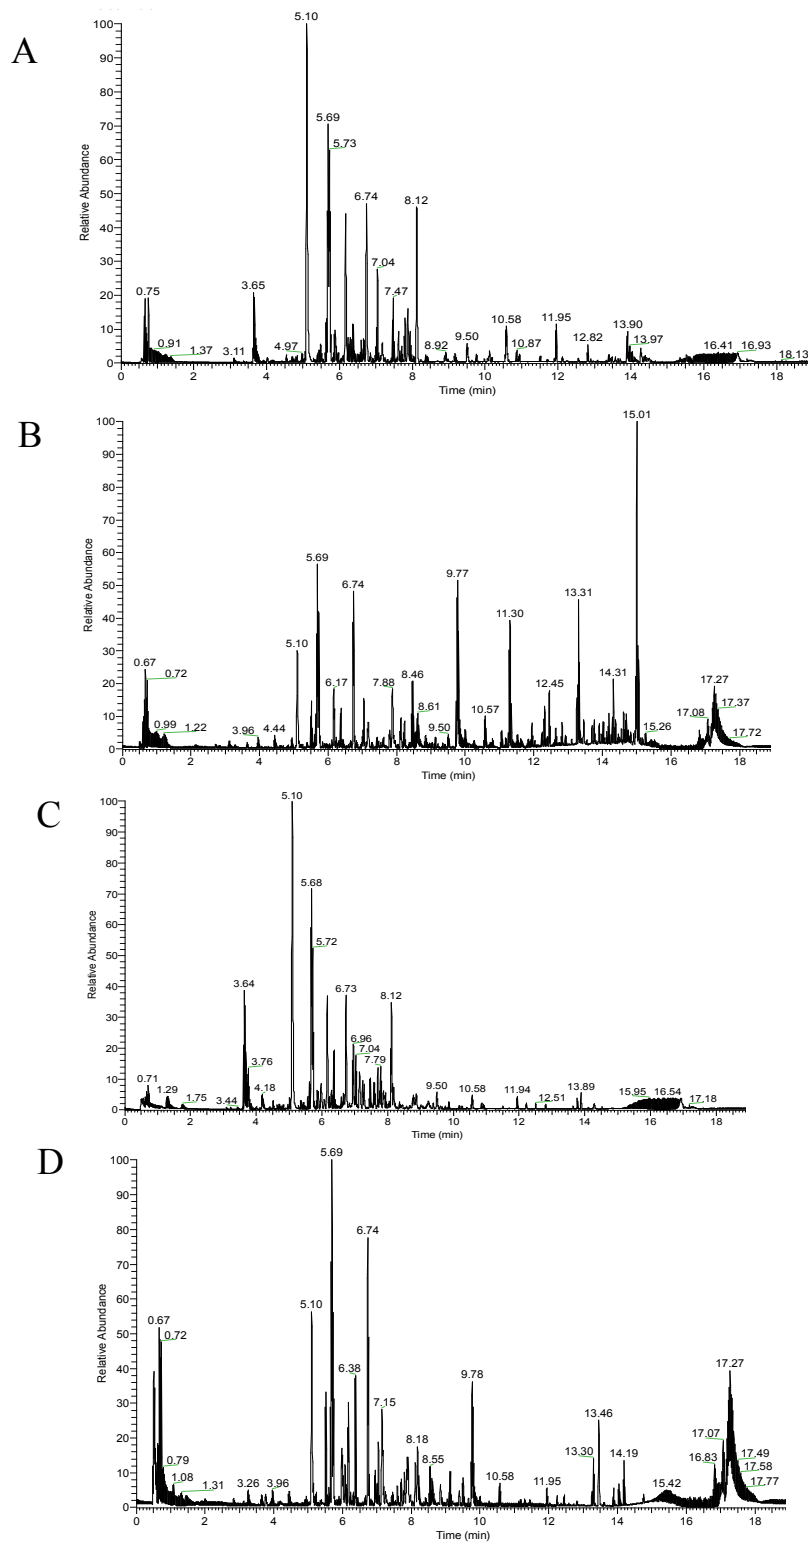

Figure S3. UPLC Base peak chromatogram of the ethanol extract of lavender, A: negative mode; B, positive mode and aqueous extract of lavender, C, negative mode; D, positive mode.

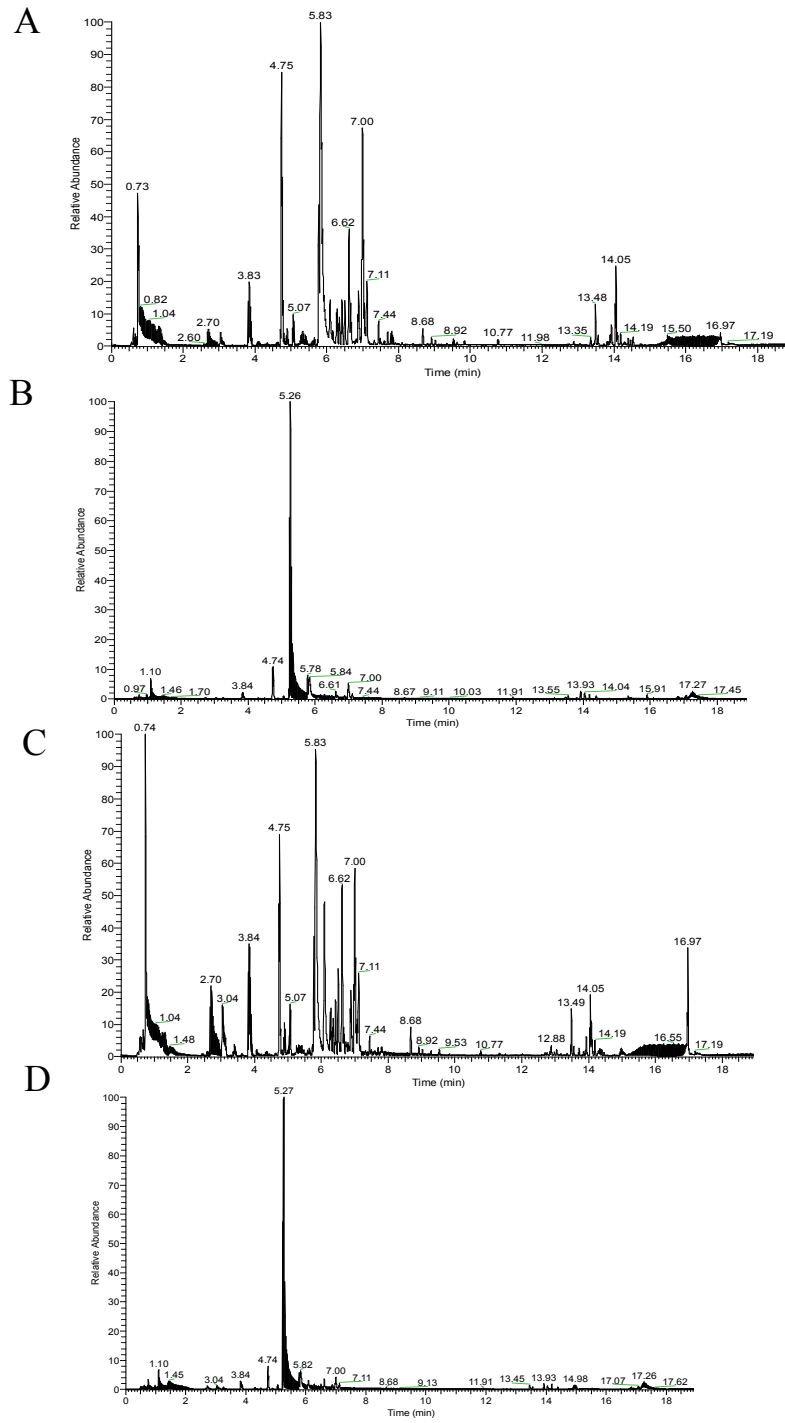

Figure S4. UPLC Base peak chromatogram of the ethanol extract of green tea, A: negative mode; B, positive mode and aqueous extract of green tea, C, negative mode; D, positive mode.

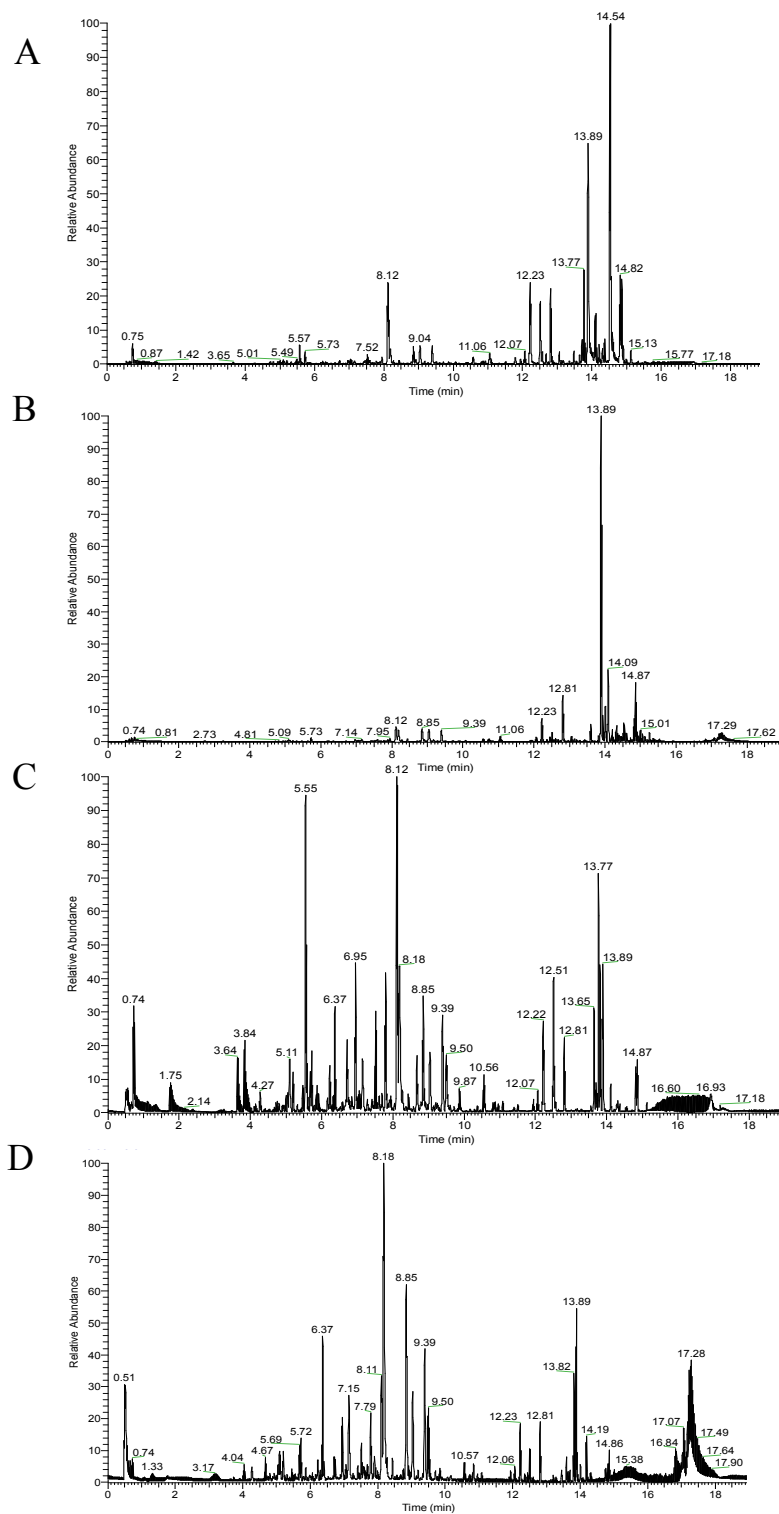

Figure S5. UPLC Base peak chromatogram of the ethanol extract of rosemary, A: negative mode; B, positive mode and aqueous extract of rosemary, C, negative mode; D, positive mode.

**Table S1. The identified compounds in the selected herbal extracts based on UPLC–HR–ESI– MS/MS analysis.**

| RT (min) | M-H         | M+H       | Formula   | Mass Error | Mass fragmentation  | Tentative compound name                        |
|----------|-------------|-----------|-----------|------------|---------------------|------------------------------------------------|
| 3.63     | 609.12622   |           | C30H25O15 | 3.83       | 108,152,315,423     | Cyanidin 3-(6"-caffeylglucoside)               |
| 14.21    | 373.20172   |           | C22H29O5  | 3          | 297,315             | 11,12-Dimethylrosmanol                         |
| 6.37     | 225.1127    | 227.12737 | C12H17O4  | 2.5        | 135,179             | 12-hydroxyjasmonic acid                        |
| 6.5      | 163.0390629 |           | C9H7O3    | -5.89      |                     | 2-Hydroxycinnamic acid                         |
| 12.45    |             | 315.08585 | C17H15O6  | -1.47      | 135,168             | 3,7-Dihydroxy-5,6-dimethoxyflavone             |
| 11.95    | 287.2228    | 289.23676 | C16H31O4  | 4          | 112,174,248         | 4,12-Dihydroxy-hexadecanoic acid               |
| 9.77     |             | 177.05455 | C10H9O3   | -0.3       | 81,121              | 4-Methylumbelliferone                          |
| 13.1     | 313.0719    | 315.0859  | C17H13O6  | 3.85       | 255,283             | 5,6-Dihydroxy-3,7-dimethoxyflavone             |
| 14.26    |             | 329.1015  | C18H17O6  | -1.3       | 243,271,299,313     | 5-Hydroxy-4,6,4'-trimethoxyaurone              |
| 13.49    | 389.197     |           | C22H29O6  | 2.96       | 285,303,345         | 6,7-Dimethoxy-7-epirosmanol                    |
| 13.82    | 359.1861    | 361.2002  | C21H27O5  | 2.22       | 227,283             | 7-Methylrosmanol                               |
| 10.89    |             | 301.0702  | C16H13O6  | -1.5       | 153,258,286,        | 8-C-Methylkaempferol                           |
| 11.51    | 329.23315   |           | C18H33O5  | 2.7        | 112,145,211,        | 9,10,11-trihydroxy-12-octadecenoic acid        |
| 7.82     | 413.122     |           | C22H21O8  | -2.69      |                     | Aciculatin                                     |
| 14.17    |             | 239.20007 | C15H27O2  | -0.487     | 81,91,105,107,184   | alpha-Bisabolol oxide C                        |
| 5.01     | 451.21881   |           | C27H31O6  | 16.03      | 293                 | Amoradinin                                     |
| 10.57    | 269.04538   | 271.05969 | C15H11O5  | -0.41      | 119,153,163,204,243 | Apigenin                                       |
| 8.69     | 517.09833   | 519.11328 | C24H23O13 | -0.037     | 271,519             | Apigenin 5-(6"-malonylglucoside)               |
| 9.27     | 593.13055   |           | C30H25O13 | 2.66       | 161,179,263,269,283 | Apigenin 7-(6"-E-Caffeoylglucoside)            |
| 8.99     | 473.10898   | 475.12299 | C23H23O11 | -0.49      | 121,271             | Apigenin 7-O-(2"-O-acetylglucoside)            |
| 7.88     | 431.09827   | 433.11197 | C21H21O10 | -0.95      | 271                 | Apigenin 7-O-glucoside                         |
| 9.64     | 559.10876   | 561.12244 | C26H25O14 | -1.44      | 271,517             | Apigenin-7-O-(6``-malonyl-4``-acetylglucoside) |
| 5.64     | 401.14542   |           | C18H25O10 | 2.98       | 121,161,174,269,327 | Benzyl O-[arabinofuranosyl-(1->6)-glucoside]   |
| 0.66     | 215.0321    |           | C12H7O4   | -8.2       | 108, 157            | Bergapten                                      |
| 8        | 373.22165   |           | C19H32O7  | 3.25       |                     | Blumenol C glucoside                           |

|       |           |           |           |       |                        |                                     |
|-------|-----------|-----------|-----------|-------|------------------------|-------------------------------------|
| 5.27  |           | 195.0875  | C8H11N4O2 | 0     | 123,138,163,           | Caffeine                            |
| 4.18  | 311.041   |           | C13H11O9  | 3.8   | 135,179                | Caffeoyl tartaric acid              |
| 14.54 | 331.1911  | 333.2051  | C20H27O4  | 2.24  | 287                    | Carnosic acid                       |
| 14.82 | 331.1912  | 333.2054  | C20H27O4  | 2.42  | 259                    | Carnosic acid isomer                |
| 13.89 | 329.1753  | 331.1896  | C20H25O4  | 1.77  | 201,285                | Carnosol                            |
| 14.31 |           | 207.17412 | C14H23O   | -1.07 | 93,107,123,135,153,100 | Carylophyllene oxide                |
| 7     | 441.0822  |           | C22H17O10 | 1.26  | 125,169,289            | Catechin gallate                    |
| 7.24  | 521.1303  |           | C24H25O13 | 2.4   | 161,285,447            | Centaurein                          |
| 5.05  | 353.08759 |           | C16H17O9  | 2.49  | 135,179,191,           | Chlorogenic acid                    |
| 4.27  | 353.0879  | 355.1018  | C16H17O9  | 3.34  | 135,191,307            | Chlorogenic acid isomer             |
| 5.69  | 355.10287 | 357.11722 | C16H19O9  | 1.44  | 134,149,193,           | cis-GMCA                            |
| 7.04  | 567.2085  |           | C27H35O13 | 2.2   | 112,329                | Citrusin B                          |
| 8.37  | 371.1351  |           | C17H23O9  | 3.9   | 135,161,197,269,311    | Citrusin E                          |
| 6.9   | 341.12421 |           | C16H21O8  | 3.2   | 133,161,174,300,330    | Coniferin                           |
| 6.17  | 325.0925  | 327.10675 | C15H17O8  | 2.17  | 119,163                | Coumaroyl glucose                   |
| 5.2   | 353.0878  | 355.1017  | C16H17O9  | 3.09  | 135,173,179,191        | Cryptochlorogenic                   |
| 12.64 |           | 153.12721 | C10H17O   | -1.1  | 81,93,107,135          | Dihydrocarvone                      |
| 6.23  | 371.0981  |           | C16H19O10 | 2.09  | 109,135,203,269,313    | Dihydroferulic acid 4-O-glucuronide |
| 7.64  | 515.11938 |           | C25H23O12 | 1.89  | 179,191,353,375        | Di-O-caffeoylquinic acid            |
| 7.44  | 515.11945 |           | C25H23O12 | 2.03  | 161,179,191,300,353    | Di-O-Caffeoylquinic acid isomer 1   |
| 7.95  | 515.11938 |           | C25H23O12 | 1.89  | 179,191,353,375        | Di-O-caffeoylquinic acid isomer 2   |
| 12.07 | 299.0559  | 301.0703  | C16H11O6  | 3.09  | 256,284                | Diosmetin                           |
| 5.51  |           | 227.12531 | C12H19O4  | -10.9 | 91,147,177             | epi-4'-hydroxyjasmonic acid         |
| 7.8   | 455.0987  |           | C23H19O10 | 3.11  | 125,183,289,           | Epicatechin 3-O-(4-O-methylgallate) |
| 4.75  | 305.06689 |           | C15H13O7  | 3.79  | 125,137,167,177,219    | Epigallocatechin                    |
| 5.83  | 457.0772  |           | C22H17O11 | 1.405 | 125,169,179,305        | Epigallocatechin Gallate            |
| 6.09  | 457.0772  |           | C22H17O11 | 1.405 | 125,169,179,305        | Epigallocatechin Gallate isomer     |
| 5.57  | 305.0701  |           | C15H13O7  | 14.72 | 180,207,235            | Epigallocatechin isomer             |
| 11.06 | 345.1704  | 347.1848  | C20H25O5  | 2.28  | 201,271,301            | Epirosmanol                         |
| 10.92 | 359.0774  | 361.0915  | C18H15O8  | 3.55  | 179,258,286,329        | Eupatin                             |

|       |             |           |           |        |                         |                                         |
|-------|-------------|-----------|-----------|--------|-------------------------|-----------------------------------------|
| 12.35 |             | 375.107   | C19H19O8  | -1.1   | 182,227,317             | Eupatoretin                             |
| 12.61 | 343.0822    | 345.0967  | C18H15O7  | 2.94   | 270,298                 | Eupatorin                               |
| 8.42  | 193.04974   | 195.06505 | C10H9O4   | 1.061  | 93,133                  | Ferulic acid                            |
| 0.73  | 533.1724    |           | C26H29O12 | 13.143 | 191,341,                | Flavonol 3-O-D-xylosylglycoside         |
| 5.07  | 579.1516    |           | C30H27O12 | 3.19   | 109,137,245,289         | Gambiriin A1                            |
| 3.84  | 153.0183    |           | C7H5O4    | 0.09   | 108                     | Gentisic acid                           |
| 2.7   | 331.0672    |           | C13H15O10 | 3.706  | 169                     | Glucogallic acid                        |
| 1.85  | 132.1026798 |           | C6H14NO2  | 5.8    |                         | Isoleucine                              |
| 8.1   | 461.10904   |           | C22H21O11 | 2.6    | 209,255,283,298,313     | Isorhamnetin 7-rhamnoside               |
| 6.88  | 477.104     |           | C22H21O12 | 2.5    | 161,174,191,248,299     | isorhamnetin-3-glucoside                |
| 12.82 | 283.0609    | 285.0753  | C16H11O5  | 2.65   | 283                     | Isorosmanol                             |
| 10.77 | 285.04047   |           | C15H9O6   | 3.87   |                         | Kaempferol                              |
| 7.5   | 447.09375   |           | C21H19O11 | 3.49   | 227,255,285             | Kaempferol galactoside isomer 2         |
| 6.62  | 593.151     |           | C27H29O15 | 1.52   | 301                     | Kaempferol 3-galactoside-7-rhamnoside   |
| 7.44  | 593.152     |           | C27H29O15 | 3.17   | 285                     | Kaempferol 3-glucosyl-(1->2)-rhamnoside |
| 7.15  | 461.0728    | 463.0866  | C21H17O12 | 2.94   | 285                     | Kaempferol 3-glucuronide                |
| 6.29  | 563.1409    |           | C26H27O14 | 2.48   | 125,169,305,316,353     | Kaempferol 3-rhamnosyl-(1->4)-xyloside  |
| 6.88  | 577.1564    |           | C27H29O14 | 2.05   | 300                     | Kaempferol 7,4'-dirhamnoside            |
| 7.18  | 447.0934    | 449.10718 | C21H19O11 | 2.8    | 285                     | Kaempferol galactoside                  |
| 7.7   | 447.0938    |           | C21H19O11 | 3.49   | 169,227,255,284,305,000 | Kaempferol galactoside isomer           |
| 7.13  | 447.0938    |           | C21H17O12 | 3.49   |                         | Kaempferol galactoside isomer 3         |
| 0.75  | 491.1617    |           | C26H19O10 | 14     | 179,341,377             | Lavandupyrone A                         |
| 2.01  | 132.1026798 |           | C6H14NO2  | 5.8    |                         | Leucine                                 |
| 3.83  | 305.0665    |           | C15H13O7  | 3.11   | 125,137,165,219,261     | Leucocyanidin                           |
| 8.24  | 461.23932   |           | C22H37O10 | 2.59   | 145,174,273,301,343     | Linalool 3-[rhamnosyl-(1->6)-glucoside] |
| 9.5   | 285.0404    |           | C15H9O6   | 3.77   | 133,180,248             | Luteolin                                |
| 8.18  | 461.0732    | 463.0869  | C21H17O12 | 3.7    | 285                     | luteolin 3'-O-glucuronide               |
| 8.85  | 503.0831    | 505.0967  | C23H19O13 | 2.09   | 255,284,286,399         | Luteolin acetylglucuronide              |
| 9.39  | 503.0836    |           | C23H19O13 | 3.18   | 146,174,255,284,359     | Luteolin acetylglucuronide isomer 1     |
| 9.04  | 503.0831    | 505.0969  | C23H19O13 | -1.5   | 285                     | Luteolin acetylglucuronide isomer 2     |



|       |             |           |           |        |                          |                                            |
|-------|-------------|-----------|-----------|--------|--------------------------|--------------------------------------------|
| 9.45  | 593.18768   | 595.2015  | C28H33O14 | 2.34   | 285                      | Luteolin p-coumarylglucoside               |
| 10.57 | 329.0668    |           | C17H13O7  | 3.61   | 179,271,299              | Malvidin                                   |
| 11.84 | 359.0775    |           | C18H15O8  | 3.8    | 202,286,314              | Myricetin 3,3',4'-trimethyl ether          |
| 6.29  | 625.14178   | 627.1554  | C27H31O17 | 0      | 316                      | Myricetin 3-rhamnoside-7-glucoside         |
| 6.35  | 479.0833    |           | C21H19O13 | 2.63   | 271,316                  | Myricetin glucoside                        |
| 6.43  | 479.08298   | 481.0973  | C21H19O13 | 2      | 271,316                  | Myricetin glucoside isomer                 |
| 6.96  | 463.08847   | 465.1023  | C21H19O12 | 2.95   | 271, 316                 | Myricitrin                                 |
| 14.99 |             | 223.2054  | C15H27O   | -1     | 91,93,123,184            | Nerolidol                                  |
| 5.11  | 325.0926    |           | C15H17O8  | 2.35   | 121,163                  | O-Coumaric acid 2-glucoside                |
| 3.74  | 220.1178573 |           | C9H18NO5  | -0.4   |                          | Panthothenic Acid                          |
| 5.87  | 337.093     |           | C16H17O8  | 3.45   | 93,119,163,173           | p-Coumaroylquinic acid                     |
| 11.29 | 166.0834742 |           | C9H12NO2  | -16.74 |                          | Phenylalanine                              |
| 11.3  |             | 135.11754 | C10H15    | 5.2    |                          | p-Mentha-1,3,8-triene                      |
| 4.3   |             | 207.1032  | C12H15O3  | 1.62   | 91,115,118,130,132,      | p-Methoxycinnamic acid ethyl ester         |
| 4.9   | 577.1358    |           | C30H25O12 | 3.02   | 119,163,191,305,337      | Procyanidin B2                             |
| 0.72  | 116.0714258 |           | C5H10NO2  | 7.07   |                          | Proline                                    |
| 12.77 | 373.09299   | 375.10663 | C19H19O8  | -0.814 | 151,261,271,299,317,345, | Quercetagenin 3,7,3',4'-tetramethyl ether  |
| 7.22  | 493.09879   |           | C22H21O13 | 2.27   | 181,271,287,315,         | Quercetagenin 7-methyl ether 6-glucoside   |
| 3.05  | 609.12616   |           | C30H25O14 | 3.74   | 125,177,305,329,423      | Quercetin 3-(3-p-coumaroylglucoside)       |
| 9.28  | 591.18555   | 593.1856  | C28H33O14 | -1.5   | 285                      | Quercetin 3,3'-dimethyl ether 7-rutinoside |
| 13.2  |             | 359.1119  | C19H19O7  | -1.8   | 162,270,298,343,381      | Quercetin 3,5,7,3'-tetramethyl ether       |
| 7.48  | 433.07755   | 435.0916  | C20H17O11 | 2.33   | 255,271,301              | Quercetin 3-arabinoside                    |
| 7.02  | 463.0882    | 465.1021  | C21H19O12 | 2.69   | 301                      | Quercetin 3-galactoside                    |
| 6.5   | 595.13074   | 597.1444  | C26H27O16 | 0      | 301                      | Quercetin 3-glucosyl-(1->2)-xyloside       |
| 7.11  | 463.0891    |           | C21H19O12 | 4.33   | 285,300,330              | Quercetin 3-O-glucoside                    |
| 6.47  | 463.08835   |           | C21H19O12 | 2.69   | 134,173,301,367,389,     | Quercetin 3-O-glucoside isomer             |
| 6.88  | 609.14685   | 611.16    | C27H29O16 | 0      | 301,316,449              | Quercetin 3-rhamnoside-7-glucoside         |
| 0.74  | 191.0552    |           | C7H11O6   | 0.2    |                          | Quinic acid                                |
| 6.72  | 541.1346    | 543.1486  | C27H25O12 | 0.97   | 135,179,197,211,255      | Resveratrol 4'-(6-galloylglucoside)        |
| 13.65 | 343.1549    |           | C20H23O5  | 2.56   | 216,243,299              | Rosmadiol                                  |

|       |            |           |                                                               |        |                     |                                |
|-------|------------|-----------|---------------------------------------------------------------|--------|---------------------|--------------------------------|
| 12.51 | 345.1704   | 347.1845  | C <sub>20</sub> H <sub>25</sub> O <sub>5</sub>                | 2.11   | 168,283             | Rosmanol                       |
| 12.23 | 345.1702   | 347.1844  | C <sub>20</sub> H <sub>25</sub> O <sub>5</sub>                | 1.5    | 283,301             | Rosmanol isomer                |
| 14.31 | 315.1964   |           | C <sub>20</sub> H <sub>27</sub> O <sub>3</sub>                | 2.97   | 201,285             | Rosmaridiphenol                |
| 8.12  | 359.077    | 361.09116 | C <sub>18</sub> H <sub>15</sub> O <sub>8</sub>                | 2.3    | 135,161,197         | Rosmarinic acid                |
| 4.54  | 299.11365  |           | C <sub>14</sub> H <sub>19</sub> O <sub>7</sub>                | 3.1    | 261,293             | Salidroside                    |
| 3.65  | 417.0803   |           | C <sub>20</sub> H <sub>17</sub> O <sub>10</sub>               | -3.1   | 99,135,179,219      | Salvianolic acid G             |
| 7.59  | 577.15741  |           | C <sub>27</sub> H <sub>29</sub> O <sub>14</sub>               | 3.86   | 169,272,            | Scutellarein 7,4'-dirhamnoside |
| 4.78  | 323.07724  |           | C <sub>15</sub> H <sub>15</sub> O <sub>8</sub>                | 2.75   | 112,153,161,174     | Skimmin                        |
| 9.5   | 285.0406   | 287.05484 | C <sub>15</sub> H <sub>9</sub> O <sub>6</sub>                 | 4.1    | 133                 | Theogallin                     |
| 3.05  | 343.0671   |           | C <sub>14</sub> H <sub>15</sub> O <sub>10</sub>               | 3.22   | 191                 | Tomenin                        |
| 5.44  | 383.09628  |           | C <sub>17</sub> H <sub>19</sub> O <sub>10</sub>               | -2.59  | 151,167,229,305     | Tonghaosu                      |
| 6.74  | 355.103    | 357.11722 | C <sub>16</sub> H <sub>21</sub> O <sub>9</sub>                | -0.789 | 121,177,234         | trans-GMCA                     |
| 4.27  | 205.095701 |           | C <sub>11</sub> H <sub>13</sub> N <sub>2</sub> O <sub>2</sub> | -7.08  |                     | Tryptophan                     |
| 5.73  | 387.1658   |           | C <sub>18</sub> H <sub>27</sub> O <sub>9</sub>                | 2.1    | 387                 | Tuberonic acid glucoside       |
| 3.76  |            | 163.05795 | C <sub>6</sub> H <sub>11</sub> O <sub>5</sub>                 | -13.18 | 107,117,121,122,132 | Umbelliferone                  |
| 6.18  | 461.1669   |           | C <sub>20</sub> H <sub>29</sub> O <sub>12</sub>               | 3.35   | 131,174,248,301     | Verbasoside                    |

**Table S2. The distinctive metabolites with significant accumulation in Rosemary**

| Name                                       | p value    | log <sub>2</sub> fold change |
|--------------------------------------------|------------|------------------------------|
| 11,12-Dimethylrosmanol                     | 1.93E-09   | 10.961                       |
| 6,7-Dimethoxy-7-epirosmanol                | 0.00049338 | 11.228                       |
| 7-Methylrosmanol                           | 0.0039643  | 7.9667                       |
| Quercetin 3,3'-dimethyl ether 7-rutinoside | 0.0010523  | 3.37                         |
| Carnosic acid                              | 1.88E-05   | 10.18                        |
| Carnosol                                   | 0.00070046 | 10.32                        |
| Luteolin p-coumarylglucoside               | 0.00090372 | 2.2635                       |
| Diosmetin                                  | 0.00085396 | 10.302                       |
| Epirosmanol                                | 0.0042544  | 6.336                        |
| Isorosmanol                                | 0.0031406  | 7.3951                       |
| luteolin 3'-O-glucuronide                  | 2.28E-05   | 7.8784                       |
| Luteolin acetylglucuronide                 | 7.41E-05   | 8.5762                       |
| p-Coumaroylquinic acid                     | 0.0018996  | 4.8551                       |
| Rosmaridiphenol                            | 1.19E-07   | 4.7265                       |
| Rosmadial                                  | 0.0050944  | 8.8868                       |
| Rosmanol                                   | 1.31E-05   | 9.4685                       |
| Rosmarinic acid                            | 0.0031302  | 4.2044                       |
